P1653

### Admission high-sensitivity troponin T and NT-proBNP for outcome prediction in acute heart failure

A. Aimo<sup>1</sup>, J. Januzzi<sup>2</sup>, C. Mueller<sup>3</sup>, O. Miro<sup>4</sup>, D.A. Pascual-Figal<sup>5</sup>, J. Jacob<sup>4</sup>, P. Herrero-Puente<sup>4</sup>, P. Llorens<sup>6</sup>, D. Wussler<sup>3</sup>, N. Kozuharov<sup>3</sup>, Z. Sabti<sup>3</sup>, T. Breidhardt<sup>3</sup>, G. Vergaro<sup>7</sup>, C. Passino<sup>7</sup>, M. Emdin<sup>7</sup>

<sup>1</sup>Azienda Ospedaliero-Universitaria Pisana, Pisa, Italy; <sup>2</sup>Massachusetts General Hospital, Boston, United States of America; <sup>3</sup>University Hospital Basel, Basel, Switzerland; <sup>4</sup>University Hospital of Bellvitge, Barcelona, Spain; <sup>5</sup>University of Murcia, Murcia, Spain; <sup>6</sup>General University Hospital of Alicante, Alicante, Spain; <sup>7</sup>Fondazione Toscana Gabriele Monasterio, Pisa, Italy

**Background:** High-sensitivity troponin T (hs-TnT) reflects the severity of ongoing myocardial damage and holds independent prognostic significance in chronic heart failure (HF). In acute HF (AHF), its additive prognostic value over natriuretic peptides is unclear.

**Methods:** Individual data of 1571 AHF patients with admission hs-TnT were collected from 3 cohorts.

**Results:** Patients were aged 78±10 years, and 51% were men. Median hs-TnT and N-terminal fraction of pro-B-type natriuretic peptide (NT-proBNP) concentrations were 43 ng/L (interquartile interval 26–69) and 5660 (2693–12466), respectively. Patients experiencing in-hospital death (n=187, 13%) had significantly higher hs-TnT and NT-proBNP on admission (both p<0.001). The risk of in-hospital death increased by 45% per each doubling of hs-TnT (HR 1.45, 95% confidence interval - CI 1.31–1.59,

p<0.001), and by 32% per each doubling of NT-proBNP (HR 1.32, 95% CI 1.17–1.50, p<0.001). Patients with hs-TnT ≥43 ng/L and NT-proBNP ≥5660 ng/L had a 2.7-fold higher risk of in-hospital death (relative risk - RR 2.7, 95% CI 1.7–4.5). Among the 1262 patients discharged, 1024 deaths occurred over a median 11-month follow-up (4–22). In a model including NT-proBNP, hs-TnT ≥43 ng/L was a strong, independent predictor of all-cause death at 6, 12 and 24 months, and the composite of cardiovascular death or HF hospitalization at 6 and 24 months. hs-TnT ≥43 ng/L also improved risk reclassification.

**Conclusions:** The risk of in-hospital death is almost 3 folds higher with admission hs-TnT ≥43 ng/L and NT-proBNP ≥5660 ng/L, and hs-TnT ≥43 ng/L holds strong independent prognostic significance for post-discharge outcome.

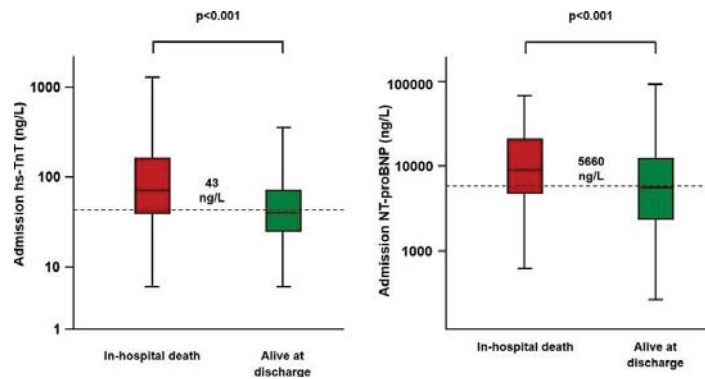

Source: http://academic.oup.com/eurheartj/article-pdf/40/Supplement_1/ehz748.0412/30202656/ehz748.0412.pdf
